# Supplementary material for: Selective methanol formationviaCO-assisted direct partial oxidation of methane over copper-containing CHA-type zeolites prepared by one-pot synthesis
Source: Royal Society of Chemistry journal article supplement (doi:10.1039/d0gc03645e), 2021-01-01
Supplement: d0gc03645e1.pdf [file d0gc03645e1.pdf]

*Supplementary Information*

Selective Methanol Formation via CO-Assisted Direct  
Partial Oxidation of Methane over Copper containing  
CHA-type Zeolites Prepared by One-pot Synthesis

Sibel Sogukkanli,<sup>a</sup> Takahiko Moteki,<sup>\*a</sup> and Masaru Ogura<sup>a</sup>

<sup>a</sup>Institute of Industrial Science, The University of Tokyo, 4-6-1 Komaba, Meguro-ku, Tokyo,  
153-8505, Japan

E-mail: moteki@iis.u-tokyo.ac.jp

## Table of Contents

**Figure S1** Illustration of (a) catalytic conversion of methane to methanol over copper containing CHA-type zeolites, and (b) experimental set-up for a batch reactor in an oil bath.

**Figure S2** Temperature profiles of oil baths during heating-up to (a) 423, (b) 448, and (c) 473 K.

**Figure S3** Calibration curve of CH<sub>3</sub>OH for GC-FID.

**Figure S4** (a) XRD patterns and (b) Nitrogen adsorption-desorption isotherms of calcined Cu-CHA materials prepared either by one-pot synthesis method with different copper loadings or liquid ion-exchange.

**Figure S5** SEM images of (a) conventional CHA-type zeolite and (b) one-pot synthesized Cu-CHA-T(0.5) sample.

**Figure S6** The mole fraction of (a) CH<sub>4</sub> and (b) O<sub>2</sub> in water at different temperatures and partial pressures of gaseous. This figure is designed based on previous literature in References from 3 to 6.

**Figure S7** Diffuse Reflectance (DR) UV-Vis spectra of (a) one-pot synthesized Cu-CHA materials having different copper loadings and Cu-TEPA complex in solution, (b) liquid ion-exchanged and calcined conventional CHA-type materials.

**Figure S8** CO consumption (grey open diamond) and CO<sub>2</sub> formation (black filled diamond) over (a) Cu-CHA-T(0.5) and (b) Cu-CHA-IE(0.5) zeolite catalysts (0.2 MPa O<sub>2</sub>, 0.5 MPa CO, 2.0 MPa, 5 mL H<sub>2</sub>O, 50 mg catalyst). Right axis shows the theoretical CO conversion limited by O<sub>2</sub> amount.

## References

## 1. Supplementary Figures

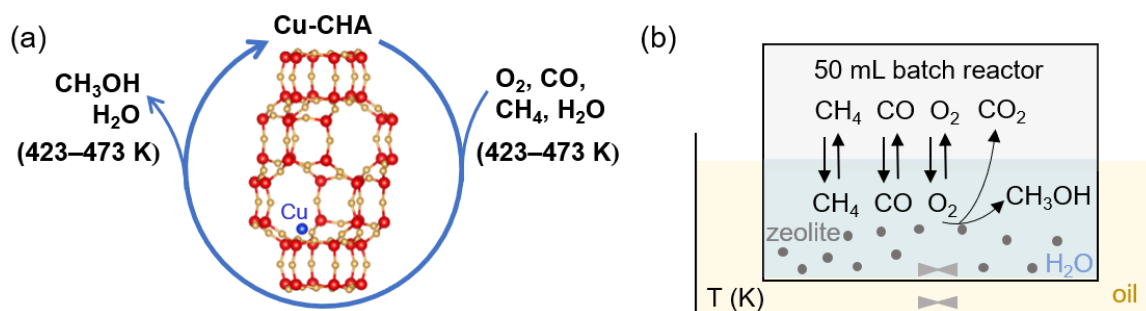

**Figure S1** Illustration of (a) catalytic conversion of methane to methanol over copper containing CHA-type zeolites, and (b) experimental set-up for a batch reactor in an oil bath.

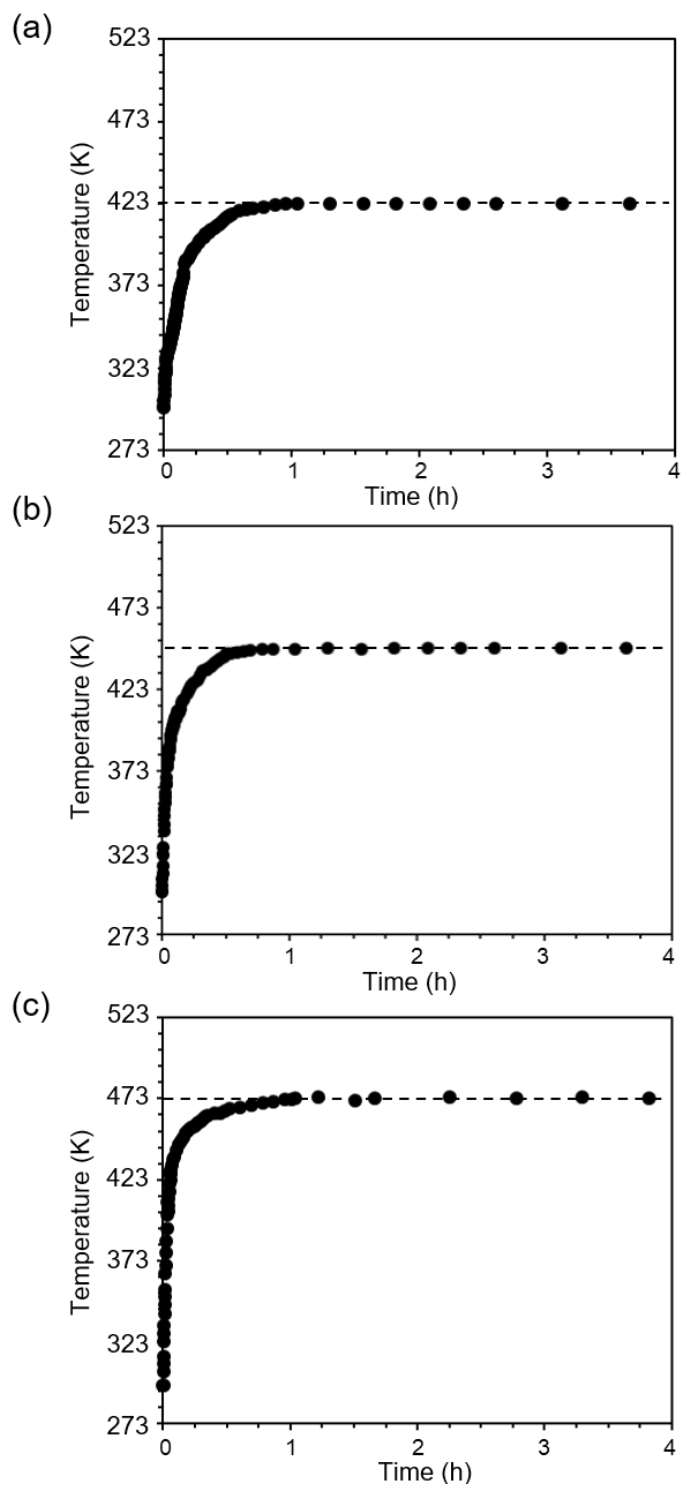

**Figure S2** Temperature profiles of oil baths during heating-up to (a) 423, (b) 448, and (c) 473 K.

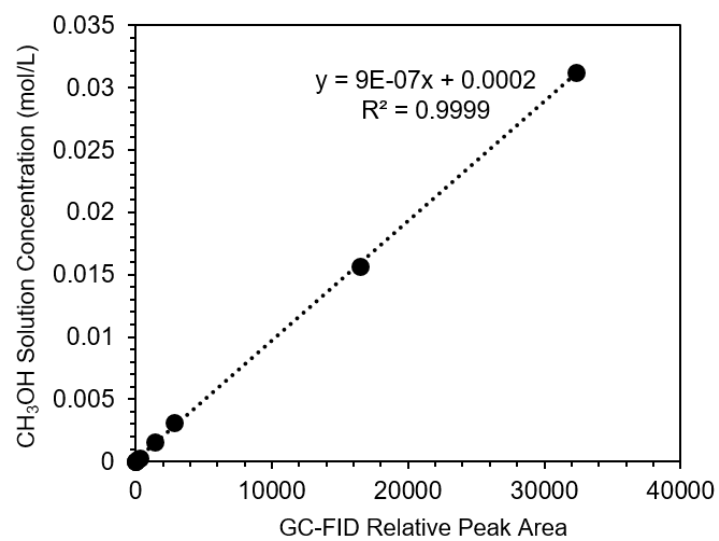

**Figure S3** Calibration curve of CH<sub>3</sub>OH for GC-FID.

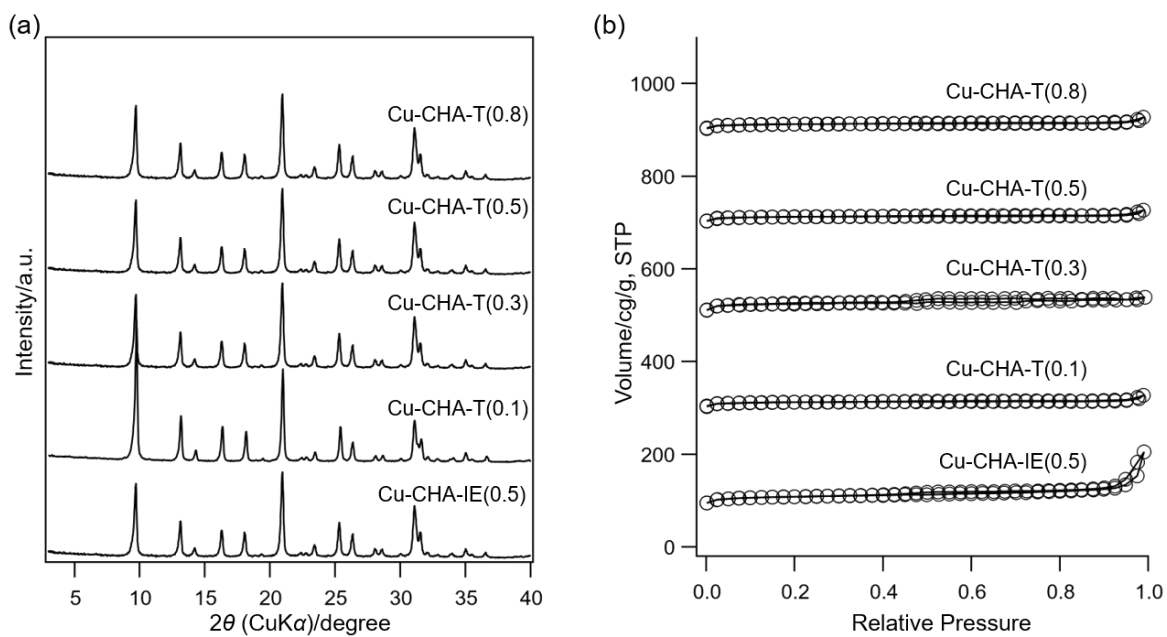

**Figure S4** (a) XRD patterns and (b) Nitrogen adsorption-desorption isotherms of calcined Cu-CHA materials prepared either by one-pot synthesis method with different copper loadings or liquid ion-exchange.

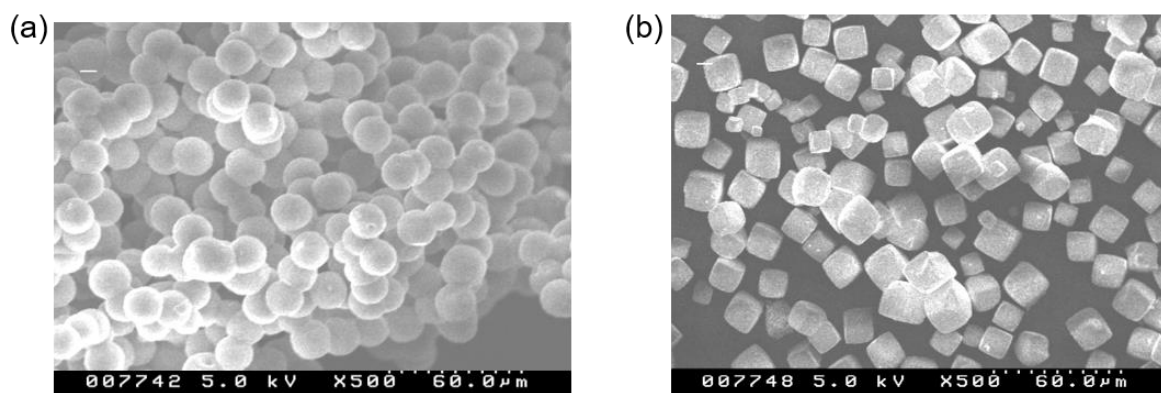

**Figure S5** SEM images of (a) conventional CHA-type zeolite and (b) one-pot synthesized Cu-CHA-T(0.5) sample.

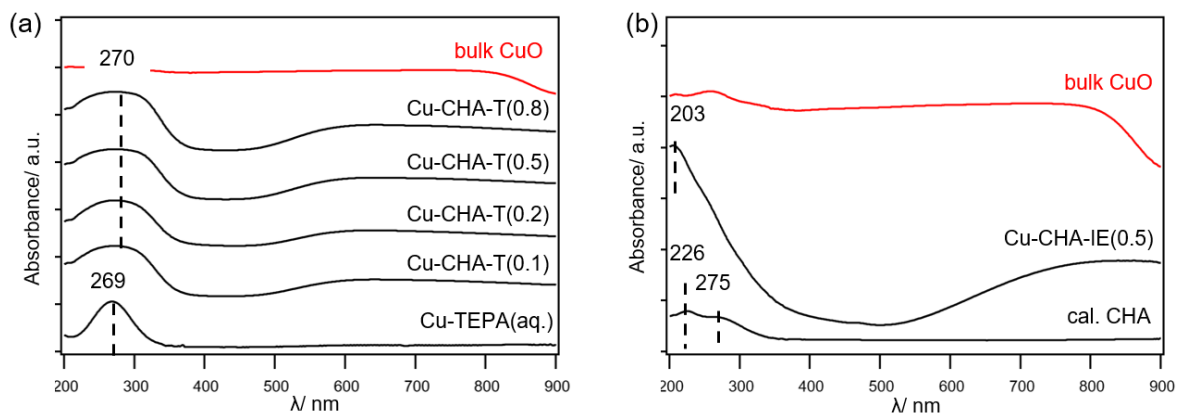

**Figure S6** Diffuse Reflectance (DR) UV-Vis spectra of (a) one-pot synthesized Cu-CHA materials having different copper loadings and Cu-TEPA complex in solution, (b) liquid ion-exchanged and calcined conventional CHA-type materials.



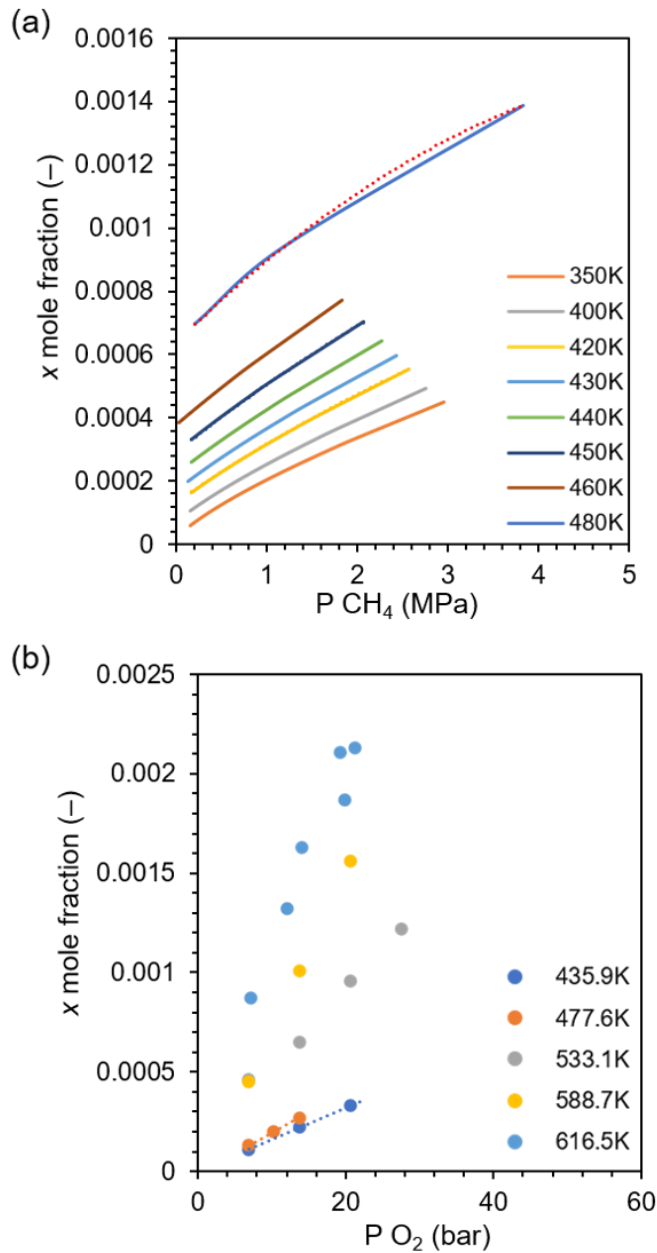

**Figure S7** The mole fraction of (a) CH<sub>4</sub> and (b) O<sub>2</sub> in water at different temperatures and partial pressures of gaseous. This figure is designed based on previous literature in References from 1 to 4.

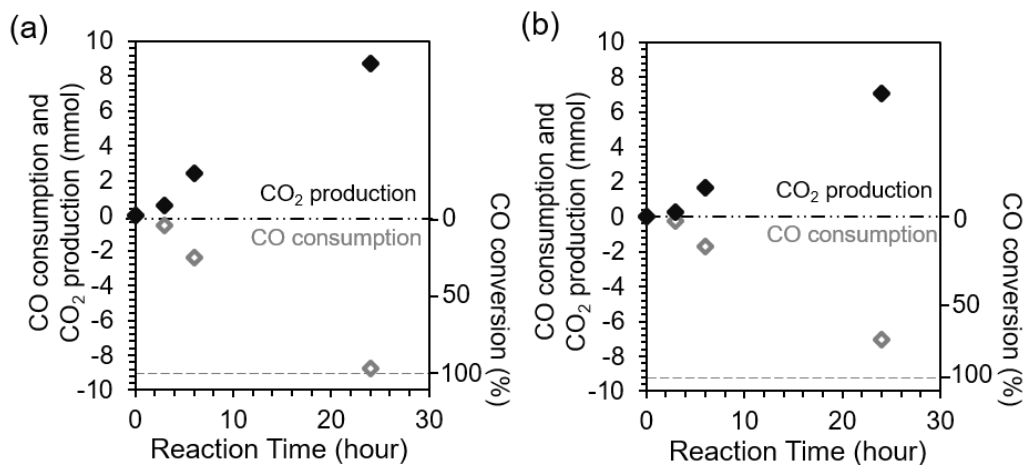

**Figure S8** CO consumption (grey open diamond) and CO<sub>2</sub> formation (black filled diamond) over (a) Cu-CHA-T(0.5) and (b) Cu-CHA-IE(0.5) zeolite catalysts (0.2 MPa O<sub>2</sub>, 0.5 MPa CO, 2.0 MPa, 5 mL H<sub>2</sub>O, 50 mg catalyst). Right axis shows the theoretical CO conversion limited by O<sub>2</sub> amount.

## 2. References

- [1] H. A. Pray, C. E. Schweichert, B. H. Minnich, *Ing. Eng. Chem.* **1952**, 44, 1147–1151.
- [2] E. F. Stephan, N. S. Hatfield, R. S. Peoples, H. A. H. Pray, 1956, Report No. BMI–1067, Battelle Memorial Institute, Columbus, Ohio, USA.
- [3] C. W. Blount, L. C. Price, 1982, Report No. DOE/ET/12145–1, Department of Geology, Idaho State University, Pocatello, Idaho, USA.
- [4] J. Jung, O. Knacke, D. Neuschütz, *Chemie–Ing.–Techn.* **1971**, 43, 112–116.
